# Supplementary material for: Chemo- and regioselective cyclotrimerization of monoynes catalyzed by a nickel(0) and zinc(ii) phenoxide system
Source: Royal Society of Chemistry journal article supplement (doi:10.1039/b008882j), 2001-01-01
Supplement: b008882j.doc [file b008882j.doc]

**Supporting Information**

**Chemo- and regioselective cyclotrimerization of monoynes catalyzed by a nickel(0) and zinc(II) phenoxide system**

Naoyoshi Mori, Shin-ichi Ikeda,* and Kazunori Odashima

*Faculty of Pharmaceutical Sciences, Nagoya City University*

*Tanabe-dori, Mizuho-ku, Nagoya 467-8603, Japan*

**General Comments.** All reactions were carried out under dry N2 atmosphere. 1H and 13C NMR spectra were recorded in CDCl3 with Me4Si as an internal standard. Under otherwise noted, all materials were obtained from commercial suppliers and used without further purification. Tetrahydrofuran (THF) was distilled from sodium/benzophenone after lithium aluminum hydride. Registry No. of **6**: [2459-10-1].

**General Procedure of Cyclotrimerization of 1 and 2.** To a solution of Ni(acac)2 (0.05 mmol) and PPh3 (0.1 mmol) in THF (5 mL) were added Et2Zn in a 1.0 M hexane solution (0.5 mL) at room temperature under N2. After stirring for 5 min, PhOH (0.8 mmol) was added to this solution, and the mixture was stirred for 5 min. To the dark red solution was added **1** (1.0 mmol) at room temperature. And a solution of **2** (2.0 mmol) in THF (2 mL) was added droppwise to the mixture, with stirring over 5-60 min at room temperature. After the addition had been completed, aqueous HCl (0.2 M, 30 mL) was added, and stirring was continued for 10 min. The aqueous layer was extracted with Et2O. The combined organic layer was washed with brine, dried over MgSO4 for 30 min, filtered, and concentrated under reduced pressure. The residue was purified by column chromatography on silica gel.

**2-(Methoxymethyl)terephthalic acid dimethyl ester (3a, 95 % regioselectivity)**: colorless crystals; mp 72-73 0C; *Rf* = 0.35 (hexane/AcOEt = 3:1); 1H NMR (400 MHz, CDCl3):  3.48 (s, 3 H, OCH3), 3.92 (s, 3 H, OCH3), 3.94 (s, 3 H, OCH3), 4.84 (s, 2 H, OCH2), 7.97-7.98 (m, 2 H, Ar), 8.29 (s, 1 H, Ar); aryl protons of minor **4a**:  8.60-8.62 (m, 2 H), 8.85-8.87 (m, 1 H); 13C NMR (100 MHz, CDCl3):  52.24, 52.34, 58.73 (OCH3), 72.10 (OCH2), 128.01, 128.66, 130.39, 131.95, 133.24, 141.00 (Ar), 166.32, 166.89 (C=O); IR (disk): 2980, 2957, 2825, 1724 (C=O), 1431, 1304, 1255, 1076, 744 cm-1; MS (DIEI, 70 eV) *m/z* (rel. int., %): 238 (M+, 39), 223 (76), 207 (77), 191 (100), 177(21). Elemental anal. calcd for C12H14O5: C 60.50, H 5.92; found: C 60.72, H 6.05.

**1,2,4-Trimethoxymethylbenzene (5, single isomer)**: a colorless oil; bp 80 °C (1 mmHg); *Rf* = 0.34 (hexane/AcOEt = 3:1); 1H NMR (400 MHz, CDCl3):  3.37 (s, 3 H, OCH3), 3.38 (s, 3 H, OCH3), 3.39 (s, 3 H, OCH3), 4.45 (s, 2 H, OCH2), 4.51 (s, 2 H, OCH2), 4.52 (s, 2 H, OCH2), 7.24-7.27 (m, 2 H, Ar), 7.35-7.37 (m, 1 H, Ar); 13C NMR (100 MHz, CDCl3):  58.00, 58.06, 58.18 (OCH3), 71.94, 72.06, 74.32 (OCH2), 126.93, 127.98, 128.83, 135.61, 136.44, 137.74 (Ar); IR (neat): 2984, 2926, 2891, 2820, 1452, 1381, 1192, 1097 cm-1; GC/MS (EI, 70 eV) *m/z* (rel. int., %): 210 (M+, 48), 178 (100). Elemental anal. calcd for C12H18O3: C 68.54, H 8.63; found: C 68.27, H 8.65.

**7 (>98 % regioselectivity)**: *Rf* = 0.32 (hexane/AcOEt = 3:1); 1H NMR (500 MHz, CDCl3):  3.39 (s, 3 H, OCH3), 3.42 (s, 3 H, OCH3), 3.91 (s, 3 H, OCH3), 4.52 (s, 2 H, OCH2), 4.56 (s, 2 H, OCH2), 7.50 (d, *J* = 7.9 Hz, 1 H, Ar), 7.97 (dd, *J* = 7.9, 1.8 Hz, 1 H, Ar), 8.04 (d, *J* = 1.8 Hz, 1 H, Ar); 13C NMR (125 MHz, CDCl3):  52.10, 58.26, 58.50 (OCH3), 71.63, 71.94 (OCH2), 128.17, 129.10, 129.36, 129.80, 136.20, 141.80 (Ar), 166.95 (C=O); GC/MS (EI, 70 eV) *m/z* (rel. int., %): 224 (M+, 8), 192 (100); HRMS for C12H16O4 (M+): calcd 224.1049; found 224.1062.

**2-[(Trimethylsilyl)oxymethyl]terephthalic acid dimethyl ester (3b, 95 % regioselectivity)**: a colorless oil; bp 70 °C (2 mmHg); *Rf* = 0.60 (hexane/AcOEt = 3:1); 1H NMR (400 MHz, CDCl3:)  0.19 (s, 9 H, SiCH3), 3.90 (s, 3 H, OCH3), 3.93 (s, 3 H, OCH3), 5.07 (s, 2 H, OCH2), 7.93-7.99 (m, 2 H, Ar), 8.39 (br s, 1 H, Ar); aryl protons of minor **4b**:  8.17-8.19 (m, 2 H), 8.60-8.62 (m, 1 H); 13C NMR (100 MHz, CDCl3):  -0.51 (SiCH3), 52.17, 52.33 (OCH3), 62.41 (OCH2), 127.48, 127.91, 130.27, 130.90, 133.33, 144.09 (Ar), 166.48, 166.80 (C=O); IR (neat): 2955, 1724 (C=O), 1437, 1408, 1248, 1113, 1066, 877, 842, 748 cm-1; GC/MS (EI, 70 eV) *m/z* (rel. int., %): 296 (M+, 22), 281 (70), 264 (100), 191 (49), 89 (98), 73 (35). Elemental anal. calcd for C14H20O5Si: C 56.73, H 6.80; found: C 56.67, H 6.91.

**2,3-Diethylterephthalic acid dimethyl ester (3c, single isomer)**: a colorless oil; bp 80 °C (2 mmHg); *Rf* = 0.47 (hexane/AcOEt = 4:1); 1H NMR (500 MHz, CDCl3):  1.21 (t, *J* = 7.5 Hz, 6 H, CH3), 2.94 (q, *J* = 7.5 Hz, 4 H, CH2), 3.90 (s, 6 H, OCH2), 7.55 (s, 2 H, Ar); 13C NMR (100 MHz, CDCl3):  15.88 (CH3), 22.72 (CH2), 52.24 (OCH3), 127.05, 134.13, 143.46 (Ar), 168.71 (C=O); IR (neat): 2955, 2876, 1728 (C=O), 1433, 1265, 1149, 1086 cm-1; GC/MS (EI, 70 eV) *m/z* (rel. int., %): 250 (M+, 60), 235 (87), 219 (100). Elemental anal. calcd for C14H18O4: C 67.18, H 7.25; found: C 66.89, H 7.12.

**2-*tert*-Butylterephthalic acid dimethyl ester (3d, 92 % regioselectivity)**: a colorless oil; bp 90 °C (2 mmHg); *Rf* = 0.51 (hexane/AcOEt = 3:1); 1H NMR (400 MHz, CDCl3):  1.41 (s, 9 H, CH3), 3.91 (s, 3 H, OCH3), 3.92 (s, 3 H, OCH3), 7.34 (d, *J* = 7.8 Hz, 1 H, Ar), 7.87 (dd, *J* = 7.8, 1.6 Hz, 1 H, Ar), 8.18 (d, *J* = 1.6 Hz, 1 H, Ar); aryl protons of minor **4d**:  8.25-8.27 (m, 2 H), 8.49-8.51 (m, 1 H); 13C NMR (100 MHz, CDCl3):  31.15 (CH3), 35.97 (C), 52.23, 52.48 (OCH3), 126.52, 128.36, 128.63, 131.06, 136.80, 147.93 (Ar), 166.61, 171.68 (C=O); IR (neat): 2955, 2914, 2876, 1730 (C=O), 1435, 1298, 1253, 1122, 1070, 760 cm-1; GC/MS (EI, 70 eV) *m/z* (rel. int., %): 250 (M+, 17), 235 (100). Elemental anal. calcd for C14H18O4: C 67.18, H 7.25; found: C 66.94, H 7.24.

**2-(Trimethylsilyl)terephthalic acid dimethyl ester (3e, 90 % regioselectivity)**: colorless crystals; mp 71-72 0C; *Rf* = 0.69 (hexane/AcOEt = 3:1); 1H NMR (400 MHz, CDCl3):  0.34 (s, 9 H, SiCH3), 3.92 (s, 3 H, OCH3), 3.94 (s, 3 H, OCH3), 8.03 (dd, *J* = 8.1, 0.5 Hz, 1 H, Ar), 8.06 (dd, *J* = 8.1, 1.7 Hz, 1 H, Ar), 8.33 (dd, *J* = 1.7, 0.5 Hz, 1 H, Ar); aryl protons of minor **4e**:  8.34-8.36 (m, 2 H), 8.63-8.65 (m, 1 H); 13C NMR (100 MHz, CDCl3):  0.04 (SiCH3), 52.21, 52.31 (OCH3), 129.76, 129.86, 132.08, 136.29, 139.51, 142.80 (Ar), 166.66, 168.10 (C=O); IR (disk): 3030, 2957, 2901, 1726 (C=O), 1437, 1290, 1255, 1116 cm-1; GC/MS (EI, 70 eV) *m/z* (rel. int., %): 266 (M+, 0), 251 (M+ - Me, 100). Elemental anal. calcd for C13H18O4Si: C 58.62, H 6.81; found: C 58.56, H 6.94.

**Biphenyl-2,5-dicarboxylic acid dimethyl ester (3f, 94 % regioselectivity)**: a pale yellow oil; bp 105 °C (2 mmHg); *Rf* = 0.48 (hexane/AcOEt = 3:1); 1H NMR (400 MHz, CDCl3):  3.65 (s, 3 H, OCH3), 3.94 (s, 3 H, OCH3), 7.31-7.34 (m, 2 H, Ar), 7.37-7.44 (m, 3 H, Ar), 7.85 (d, *J* = 8.5 Hz, 1 H, Ar), 8.03-8.07 (m, 2 H, Ar); aryl protons of minor **4f**:  8.45-8.47 (m, 2 H), 8.65-8.67 (m, 1 H); 13C NMR (100 MHz, CDCl3):  51.97, 52.20 (OCH3), 126.96, 127.49, 127.90, 127.91, 128.04, 128.08, 129.54, 131.50, 132.22, 134.71, 140.05, 142.23 (Ar), 165.90, 168.32 (C=O); IR (neat): 3028, 2999, 2953, 1726 (C=O), 1435, 1290, 1242, 1116, 752 cm-1; MS (DIEI, 70 eV) *m/z* (rel. int., %): 270 (M+, 93), 239 (100). Elemental anal. calcd for C16H14O4: C 71.10, H 5.22; found: C 70.82, H 5.25.

**4’-Methoxybiphenyl-2,5-dicarboxylic acid dimethy ester (3g, 93 % regioselectivity)**: a pale yellow oil; bp 115 °C (2 mmHg); *Rf* = 0.34 (hexane/AcOEt = 3:1); 1H NMR (500 MHz, CDCl3):  3.68 (s, 3 H, OCH3), 3.83 (s, 3 H, OCH3), 3.92 (s, 3 H, OCH3), 6.94 (d, *J* = 8.9 Hz, 2 H, Ar), 7.26 (d, *J* = 8.9 Hz, 2 H, Ar), 7.81 (d, *J* = 8.1 Hz, 1 H, Ar), 8.01 (dd, *J* = 8.1, 1.7 Hz, 1 H, Ar), 8.04 (d, *J* = 1.7 Hz, 1 H, Ar); aryl protons of minor **4g**:  8.43-8.45 (m, 2 H), 8.58-8.60 (m, 1 H); 13C NMR (125 MHz, CDCl3):  52.24, 52.40, 55.27 (OCH3), 113.76, 127.69, 129.47, 129.65, 131.70, 132.34, 132.52, 134.89, 141.96, 159.33 (Ar), 166.24, 168.84 (C=O); IR (neat): 2953, 2839, 1726 (C=O), 1610, 1435, 1288, 1249, 1116, 1043, 835, 752 cm-1; MS (DIEI, 70 eV) *m/z* (rel. int., %): 300 (M+, 100). Elemental anal. calcd for C17H16O5: C 67.99, H 5.37, found: C 67.72, H 5.37.

**4’-Cyanobiphenyl-2,5-dicarboxylic acid dimethy ester (3h, single isomer)**: white crystals; mp 134-135 °C; *Rf* = 0.20 (hexane/AcOEt = 3:1); 1H NMR (500 MHz, CDCl3):  3.69 (s, 3 H, OCH3), 3.95 (s, 3 H, OCH3), 7.42 (d, *J* = 8.5 Hz, 2 H, Ar), 7.71 (d, *J* = 8.5 Hz, 2 H, Ar), 7.97 (d, *J* = 8.1 Hz, 1 H, Ar), 8.00 (d, *J* = 1.7 Hz, 1 H, Ar), 8.13 (dd, *J* = 8.1, 1.7 Hz, 1 H, Ar); 13C NMR (125 MHz, CDCl3):  52.41, 52.61 (OCH3), 111.62, 118.69, 129.19, 129.21, 130.49, 131.95, 132.97, 134.04, 141.03, 145.25 (CN and Ar), 165.77, 167.36 (C=O); IR (neat): 2962, 2226 (CN), 1728 (C=O), 1429, 1292, 1261, 1120, 1039, 962, 842, 754 cm-1; MS (DIEI, 70 eV) *m/z* (rel. int., %): 295 (M+, 97), 264 (100). Elemental anal. calcd for C17H13NO4: C 69.15, H 4.44, N 4.74; found: C 68.85, H 4.44, N 4.54.

**2-*iso*-Propenylterephthalic acid dimethyl ester (3i, 93 % regioselectivity)**: a pale yellow oil; bp 70 °C (2 mmHg); *Rf* = 0.53 (hexane/AcOEt = 3:1); 1H NMR (500 MHz, CDCl3):  2.10 (brs, 3 H, CH3), 3.87 (s, 3 H, OCH3), 3.93 (s, 3 H, OCH3), 4.88 (brs, 1 H, =CH), 5.15 (s, 1 H, =CH), 7.80 (dd, *J* = 8.1, 0.5 Hz, 1 H, Ar), 7.92 (brs, 1 H, Ar), 7.96 (dd, *J* = 8.1, 1.7 Hz, 1 H, Ar); aryl protons of minor **4i**:  8.30-8.32 (m, 2 H), 8.56-8.58 (m, 1 H); 13C NMR (125 MHz, CDCl3):  23.96 (CH3), 52.33, 52.40 (OCH3), 114.59, 127.91, 129.66, 130.25, 132.54, 133.65, 145.01, 145.36 (=C and Ar), 166.23, 167.93 (C=O); IR (neat): 2962, 2226, 1728 (C=O), 1429, 1292, 1261, 1120, 1039, 962, 842, 754 cm-1; GC/MS (EI, 70 eV) *m/z* (rel. int., %): 234 (M+, 100). Elemental anal. calcd for C13H14O4: C 66.66, H 6.02; found: C 66.45, H 6.11.

**Preparation of 2,3-Diethyl-5-methylterephthalic acid 4-ethyl ester 1-methyl ester (9) and its regioisomer 10** **(cyclotrimerization of 1c, 2, and 8, 9:10 = 77:23).** To a solution of Ni(cod)2 (0.05 mmol) and PPh3 (0.1 mmol) in THF (5 mL) were added Et2Zn in a 1.0 M hexane solution (0.4 mL) at room temperature under N2. After stirring for 5 min, PhOH (0.8 mmol) was added to this solution, and the mixture was stirred for 5 min. To the dark red solution was added **1c** (1.0 mmol) and **8** (1.0 mmol) at room temperature. And a solution of **2** (1.0 mmol) in THF (2 mL) was added droppwise with stirring over 60 min at room temperature to the mixture. After the addition had been completed, aqueous HCl (0.2 M, 30 mL) was added, and stirring was continued for 10 min. The aqueous layer was extracted with Et2O. The combined organic layer was washed with brine, dried over MgSO4 for 30 min, filtered, and concentrated under reduced pressure. The residue was purified by column chromatography on silica gel (hexane-AcOEt, 4:1) to give a mixture of **9** and **10** in 45% yield; a colorless oil; bp 70 °C (2 mmHg); *Rf* = 0.46 (hexane/AcOEt = 4:1); 1H NMR of **9** (400 MHz, CDCl3):  1.10-1.22 (m, 6 H, CH3), 1.36-1.41 (m, 3 H, CH3), 2.26 (s, 3 H, CH3), 2.65 (q, *J* = 7.3 Hz, 2 H, CH2), 2.90 (q, *J* = 7.3 Hz, 2 H, CH2), 3.88 (s, 3 H, OCH3), 4.41 (q, *J* = 7.1 Hz, 2 H, OCH2), 7.44 (s, 1 H, Ar); 1H NMR of **10** (400 MHz, CDCl3):  1.10-1.22 (m, 6 H, CH3), 1.36-1.41 (m, 3 H, CH3), 2.54 (s, 3 H, CH3), 2.78 (q, *J* = 7.3 Hz, 2 H, CH2), 2.97 (q, *J* = 7.3 Hz, 2 H, CH2), 3.89 (s, 3 H, OCH2), 4.36 (q, *J* = 7.1 Hz, 2 H, OCH3), 8.03 (s, 1 H, Ar); 13C NMR of **9** (100 MHz, CDCl3):  14.19, 15.72, 15.89, 18.96 (CH3), 22.27, 23.70 (CH2), 52.02 (OCH3), 61.12 (OCH2), 129.32, 131.58, 131.72, 137.93, 139.29, 140.52 (Ar), 168.63, 169.94 (C=O); 13C NMR of **10** (100 MHz, CDCl3):  14.28, 15.67, 15.76, 16.87 (CH3), 22.04, 23.29 (CH2), 51.99 (OCH3), 60.96 (OCH2), 128.26, 129.37, 135.79, 140.73, 143.01, 146.24 (Ar), 168.15, 168.31 (C=O); IR (neat): 2978, 2876, 1726 (C=O), 1450, 1267, 1201, 1147, 1087 cm-1; GC/MS of **9** (EI, 70 eV) *m/z* (rel. int., %): 278 (M+, 71), 263 (23), 249 (30), 247 (56), 233 (100); GC/MS of **10** (EI, 70 eV) *m/z* (rel. int., %): 278 (M+, 91), 263 (22), 249 (76), 247 (100), 233 (89). Elemental anal. calcd for C16H22O4: C 69.04, H 7.97; found: C 68.77, H 7.96.

Authentic samples of **11** were prepared from the reaction of **1c** with **8** in the presence of Ni(0)/PPh3/Et2Zn/PhOH. In this reaction, **13** derived from the self-trimerization of **8** was obtained as a byproduct.

**2,3-Diethyl-5,6-dimethylterephthalic acid diethyl ester and its regioisomers (11)**: a colorless oil; bp 80 °C (1 mmHg); *Rf* = 0.41 (hexane/AcOEt = 4:1); 1H NMR (500 MHz, CDCl3):  1.11 (t, *J* = 7.6 Hz, 6 H of minor, CH3), 1.16 (t, *J* = 7.5 Hz, 3 H of major, CH3), 1.17 (t, *J* = 7.5 Hz, 3 H of major, CH3), 1.35-1.40 (6 H of major and minor, CH3), 2.15 (s, 6 H of minor, CH3), 2.17 (s, 3 H of major, CH3), 2.25 (s, 3 H of major, CH3), 2.55-2.61 (m, 4 H of major, CH2), 2.67 (q, *J* = 7.6 Hz, 4 H of minor, CH2), 4.35-4.41 (4 H of major and minor, OCH2); 13C NMR (125 MHz, CDCl3):  14.22, 14.24, 15.79, 15.81, 16.54, 16.72, 17.02, 17.06 (CH3), 23.46, 24.12 (CH2), 61.00, 61.03, 61.05 (OCH2), 127.83, 132.11, 132.99, 133.40, 133.53, 134.00, 135.84, 138.27, 139.02, 142.15 (Ar), 168.75, 170.25, 170.30, 170.54 (C=O); IR (neat): 2976, 2937, 2878, 1728 (C=O), 1450, 1304, 1278, 1217, 1159, 1057, 1041 cm-1; GC/MS (EI, 70 eV) *m/z* (rel. int., %): 306 (M+, 72), 277 (24), 261 (100), 232 (55). Elemental anal. calcd for C18H26O4: C 70.56, H 8.55; found: C 70.34, H 8.69.

**12**: GC/MS (EI, 70 eV) *m/z* (rel. int., %): 308 (M+, 2), 277 (20), 262 (100); HRMS for C15H17O5 (M+ - OMe): calcd 277.1076, found 277.1077.

**3,5,6-Trimethylbenzene-1,2,4-tricarboxylic acid triethyl ester (13, single isomer)**: a colorless oil; bp 105 °C (2 mmHg); *Rf* = 0.23 (hexane/AcOEt = 4:1); 1H NMR (400 MHz, CDCl3):  1.31-1.40 (m, 9 H, CH3), 2.22 (s, 3 H, CH3), 2.26 (s, 3 H, CH3), 2.30 (s, 3 H, CH3), 4.28-4.36 (m, 4 H, OCH2), 4.40 (q, *J* = 7.1 Hz, 2 H, OCH2); 13C NMR (100 MHz, CDCl3):  14.02, 14.16, 16.52, 16.98, 17.27 (CH3), 61.36, 61.44, 61.46 (OCH2), 129.87, 130.29, 132.58, 133.71, 135.79, 137.49 (Ar), 167.78, 168.47, 169.39 (C=O); IR (neat): 2984, 2937, 1736 (C=O), 1300, 1224, 1037, 1116 cm-1; DI/MS (EI, 70 eV) *m/z* (rel. int., %): 336 (M+, 8), 291 (100). Elemental anal. calcd for C18H24O6: C 64.27, H, 7.19; found: C 63.99, H 7.19.
